# Supplementary material for: Carbonate deprotonation on an Ni-rich layered cathode: development of a new cis -oligomer as an organic coverage
Source: Royal Society of Chemistry journal article supplement (doi:10.1039/d4ta05197a), 2024-01-01
Supplement: d4ta05197a1.pdf [file d4ta05197a1.pdf]

## Supporting Information

### **Carbonate deprotonation on Ni-rich layered cathode: Development of a new cis isomerism oligomer as an organic coverage**

Laurien Merinda,<sup>a</sup> Fu-Ming Wang, <sup>\*a,b,c,d</sup> Nae-Lih Wu,<sup>\*e</sup> Rio Akbar Yuwono,<sup>a</sup> Chusnul Khotimah,<sup>a</sup> Ulya Qonita,<sup>a</sup> Wei-Hsiang Huang,<sup>f</sup> Lester Pei-Wan Tiong,<sup>a</sup> Ching-Kai Chang,<sup>a</sup> Ping-Hsuan Hsu,<sup>a</sup> Chih-Wen Pao,<sup>f</sup> Jeng-Lung Chen,<sup>f</sup> Chi-Liang Chen,<sup>f</sup> and Ting-Shang Chan.<sup>f</sup>

<sup>a</sup> Graduate Institute of Applied Science and Technology, National Taiwan University of Science and Technology, Taipei 10607, Taiwan.

<sup>b</sup> Graduate Institute of Energy and Sustainability Technology, National Taiwan University of Science and Technology, Taipei 10607, Taiwan.

<sup>c</sup> Department of Chemical Engineering, Chung Yuan Christian University, Taoyuan 320314, Taiwan.

<sup>d</sup> R&D Center for Membrane Technology, Chung Yuan Christian University, Taoyuan 320314, Taiwan.

<sup>e</sup> Department of Chemical Engineering, National Taiwan University, Taipei 10617, Taiwan.

<sup>f</sup> National Synchrotron Radiation Research Center, Hsinchu 30076, Taiwan.

\*Corresponding author:

Prof. Fu-Ming Wang

IB-606, No.43, Section 4, Keelung Road, Taipei 106, Taiwan, R.O.C

E-mail: [mccabe@mail.ntust.edu.tw](mailto:mccabe@mail.ntust.edu.tw)

Tel: +886-2-27303755

Fax: +886-2-27376922

Prof. Nae-Lih Wu

Department of Chemical Engineering 208A, No.1, Section 4, Roosevelt Road, Taipei 106, Taiwan, R.O.C

E-mail: [nlw001@ntu.edu.tw](mailto:nlw001@ntu.edu.tw)

Tel: +886-2-23627158

Fax: +886-2-23623040

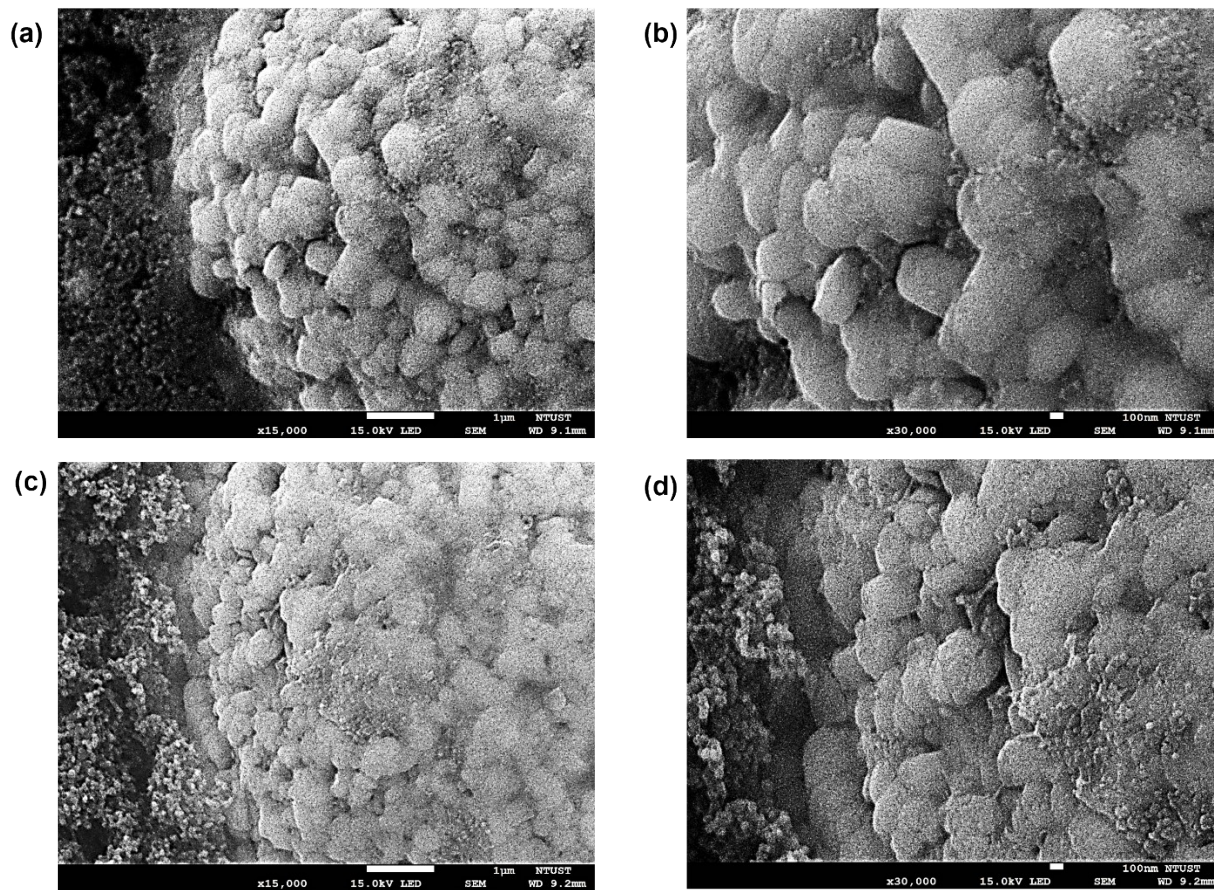

Fig. S1 SEM images of (a, b) pristine NCM811 and (c, d) Cl@NCM811 particles before cycle.

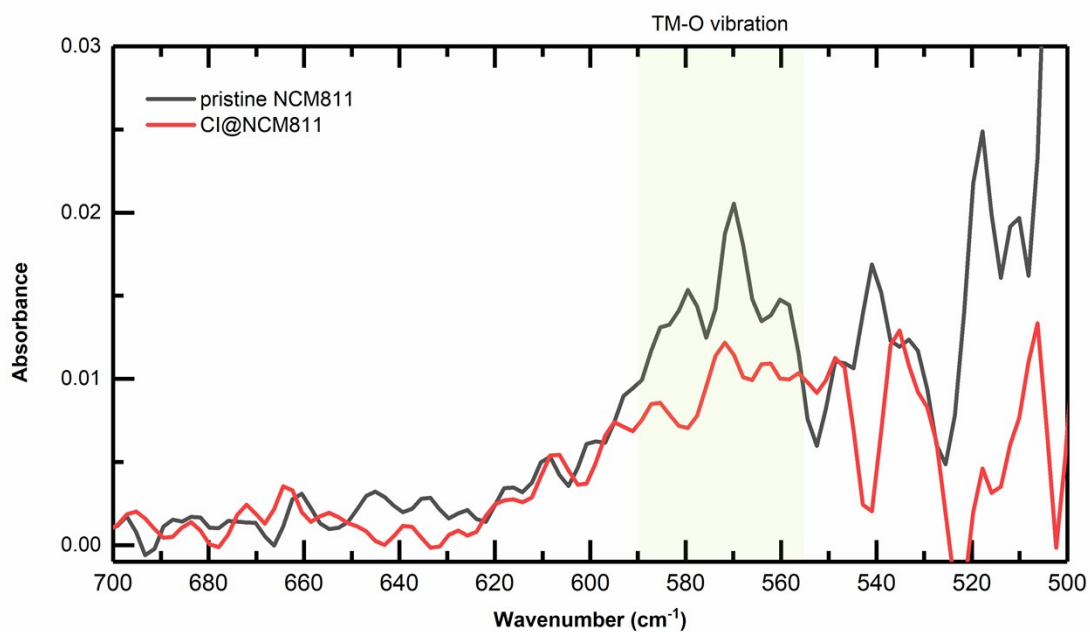

**Fig. S2** Ex situ ATR-FTIR of pristine NCM811 and Cl@NCM811 before cycle.

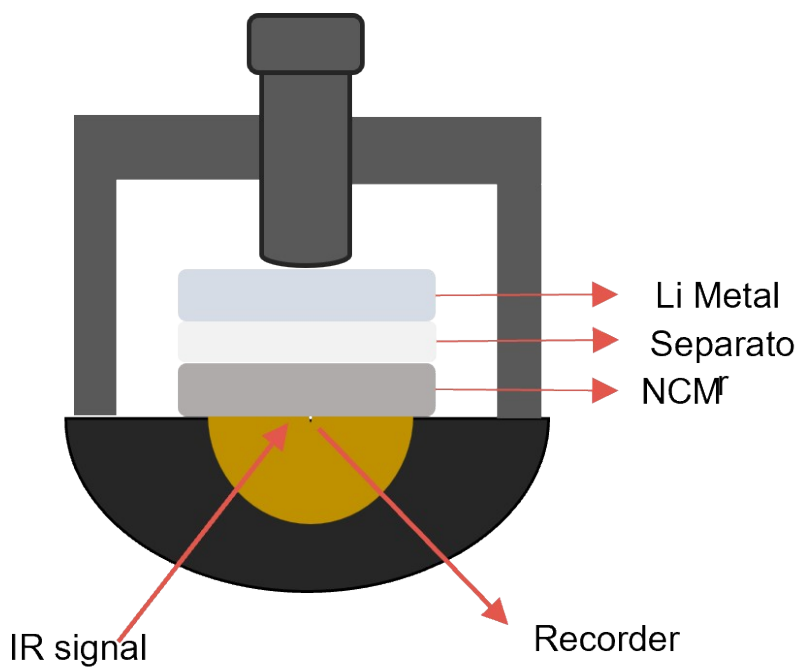

**Fig. S3** The operando ATR-FTIR electrochemical cell illustration.

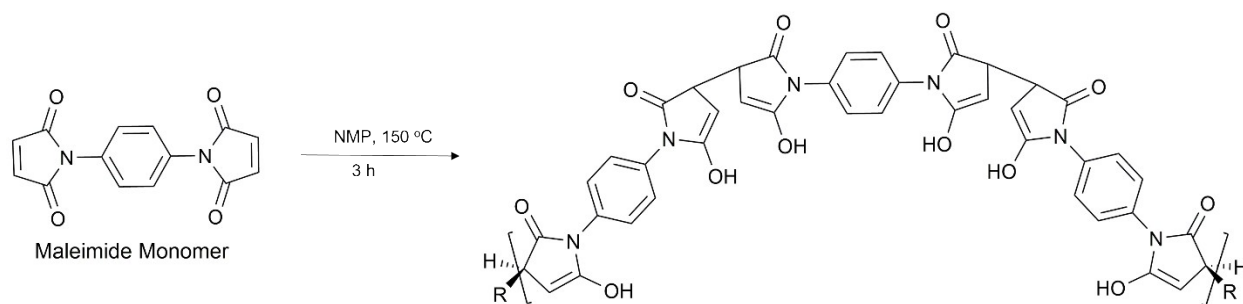

**Fig. S4** Proposed structure cis formulations of oligomer.

|             | Maleimide dissolved in NMP                        | CI Oligomer                                        |
|-------------|---------------------------------------------------|----------------------------------------------------|
| $\bar{M}_n$ | 511                                               | 907                                                |
| $\bar{M}_w$ | 554                                               | 2290                                               |
| PDI         | $\frac{\bar{M}_w}{\bar{M}_n} = 1.08$              | $\frac{\bar{M}_w}{\bar{M}_n} = 2.52$               |
| $D_p$       | $\frac{\bar{M}_n}{MW} = \frac{511}{268.22} = 1.9$ | $\frac{\bar{M}_n}{MW} = \frac{907}{268.22} = 3.38$ |

**Table S1.** GPC characteristics of maleimide monomer in NMP and its derivative CI oligomer.

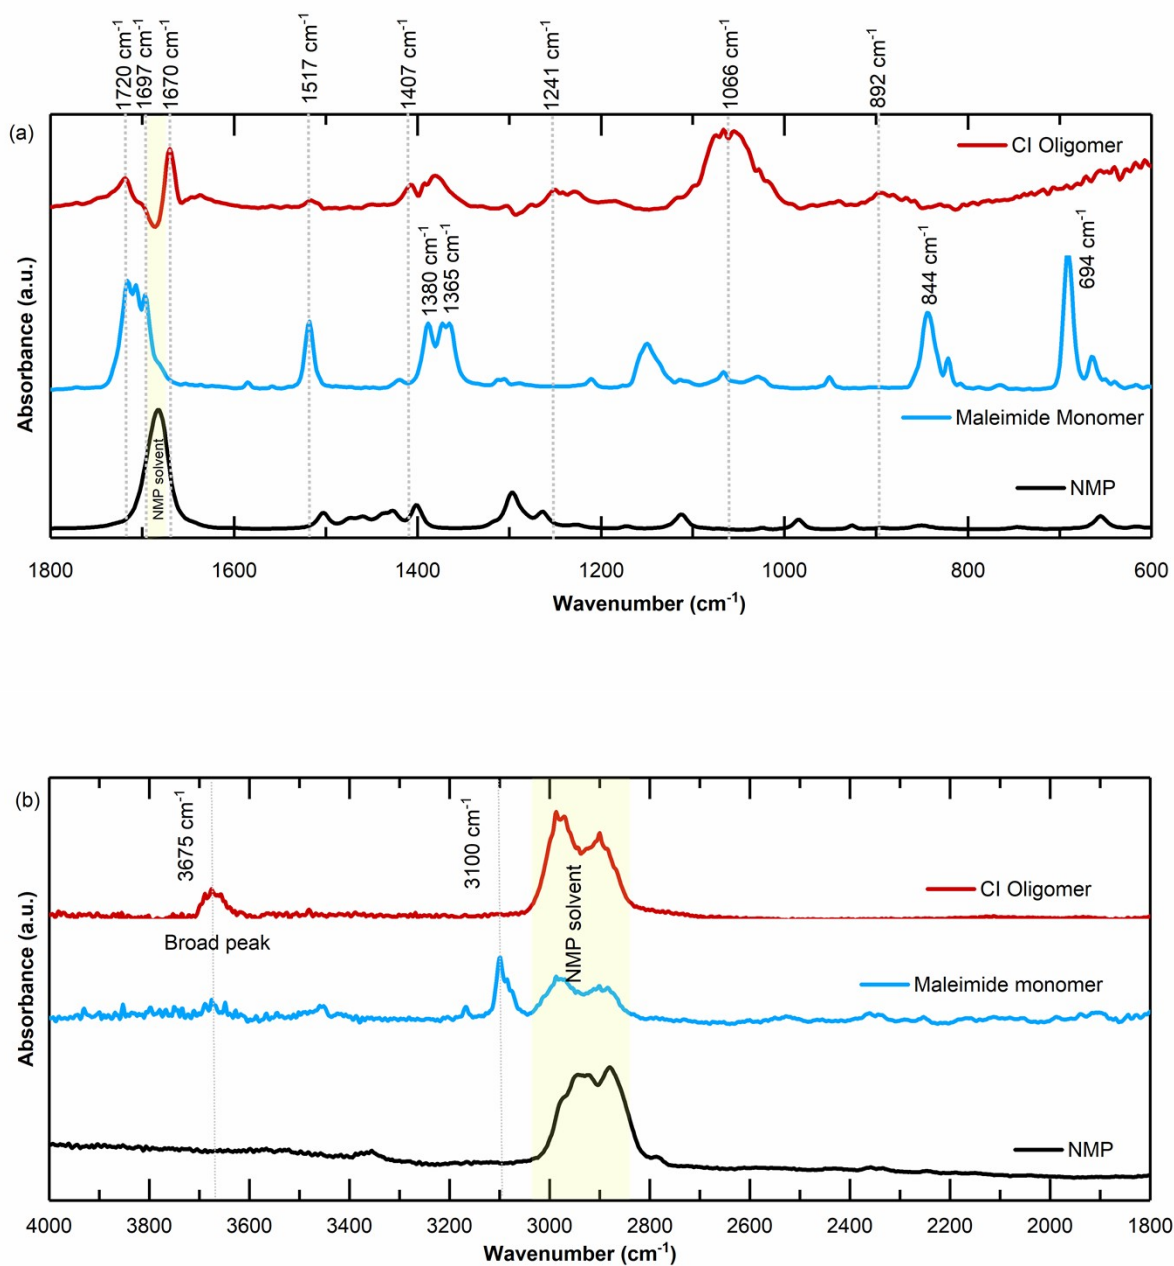

**Fig. S5** FTIR spectra of NMP, maleimide monomer, and CI oligomer at wavenumber range of (a) 600-1800  $\text{cm}^{-1}$  and (b) 1800-4000  $\text{cm}^{-1}$ . The corresponding functional group for each absorption peak in certain wavenumber is mentioned in table S2.

**Table S2.** FTIR peak table of Maleimide monomer and CI oligomer (Ref. 35)

| Wavenumber (cm <sup>-1</sup> ) | Vibrational mode                  | Species of origin              |
|--------------------------------|-----------------------------------|--------------------------------|
| 694                            | C-H bending                       | Maleimide Monomer              |
| 844                            | C-H ( 1,4 – Disubstitution)/ Para | Maleimide Monomer              |
| 892                            | C-H ( 1,4 – Disubstitution)/ Para | CI Oligomer                    |
| <b>1066</b>                    | <b>C-O stretching</b>             | <b>CI Oligomer</b>             |
| 1241                           | C-N stretch                       | CI Oligomer                    |
| 1365                           | C-N stretch                       | Maleimide Monomer              |
| 1380                           | C-N stretch                       | Maleimide Monomer              |
| 1407                           | O-H bending                       | CI Oligomer                    |
| 1517                           | Aromatic ring ( C=C-C)            | Maleimide Monomer              |
| <b>1670</b>                    | <b>C=C stretching</b>             | <b>CI Oligomer</b>             |
| <b>1697</b>                    | <b>C=C stretching</b>             | <b>Maleimide Monomer</b>       |
| 1720                           | C=O stretching                    | Maleimide Monomer, CI Oligomer |
| 3100                           | C=CH / C-H stretch                | Maleimide Monomer              |
| 3675                           | -COH / -OH                        | CI Oligomer                    |

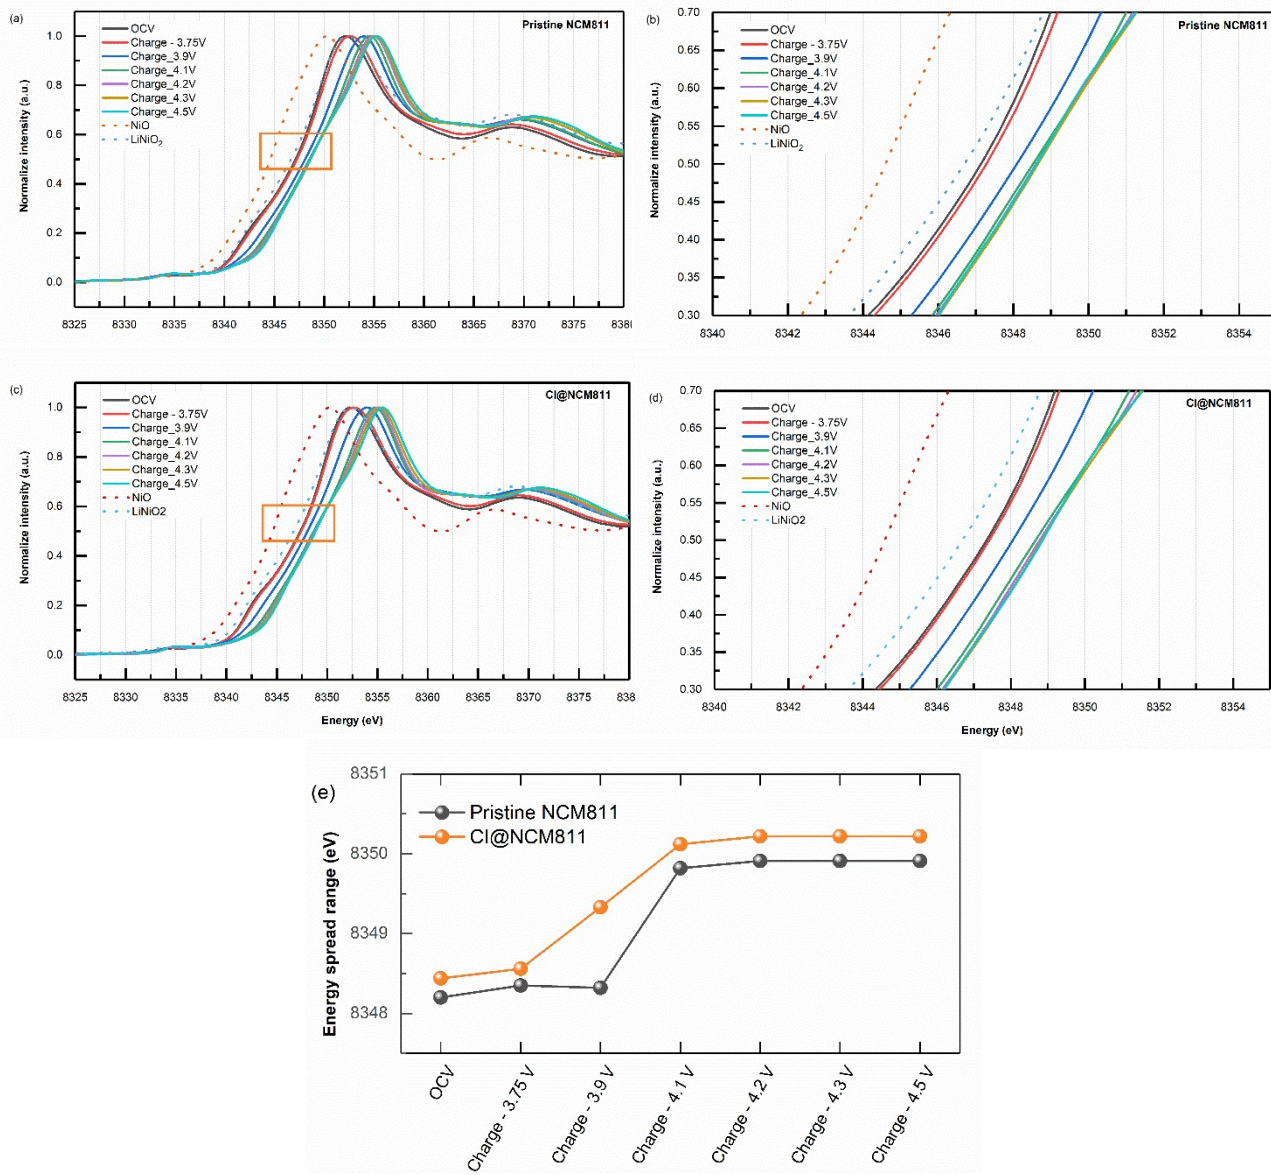

**Fig. S6** XANES spectra of Ni K-edge during first charge of (a) pristine NCM811 and (b) the magnification of the orange-square-lined region as well as (c) Cl@NCM811 and (d) the magnification of the orange-square-lined region. (e) Corresponding binding energy at specify normalized intensity of 0.6 of the edge jump.



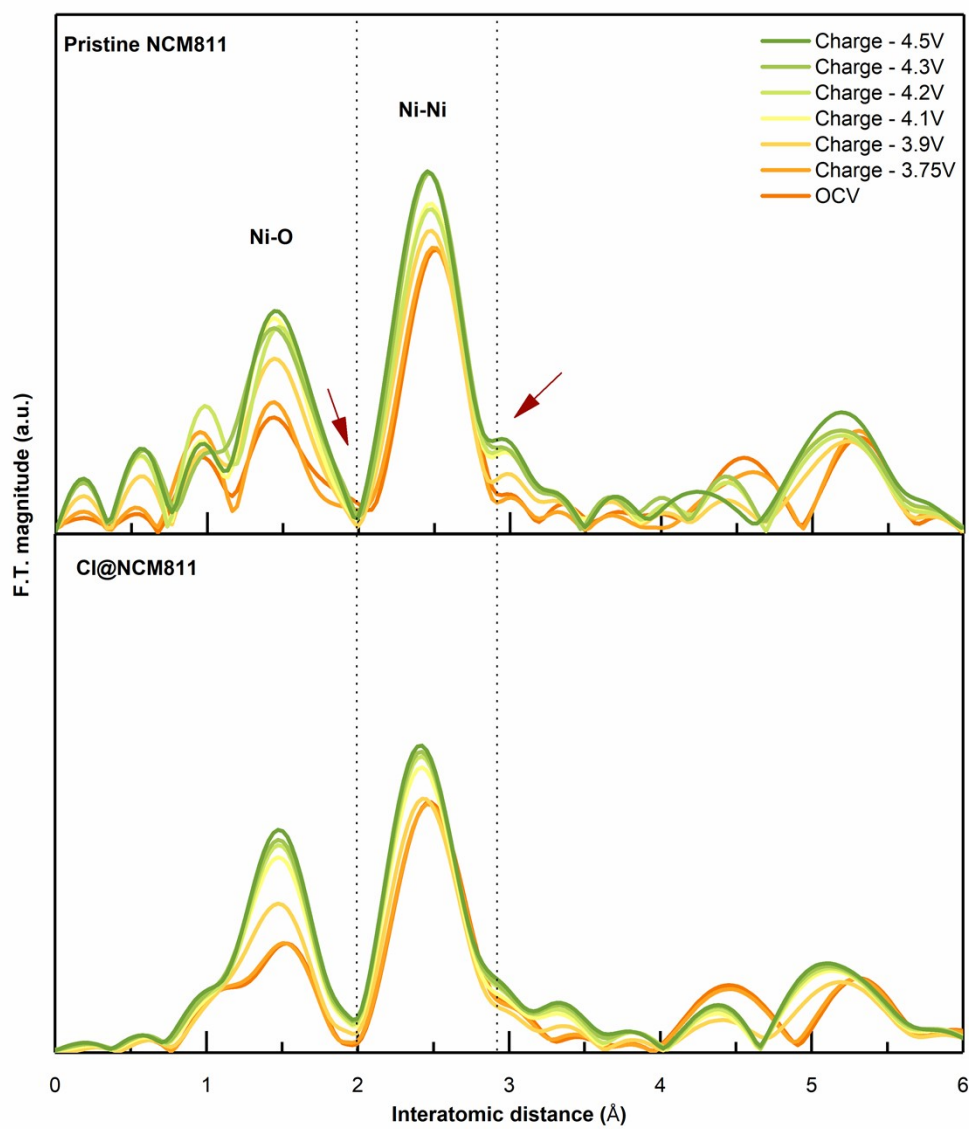

**Fig. S7** Ni K-edge EXAFS spectra of pristine NCM811 and Cl@NCM811 in the first charge.

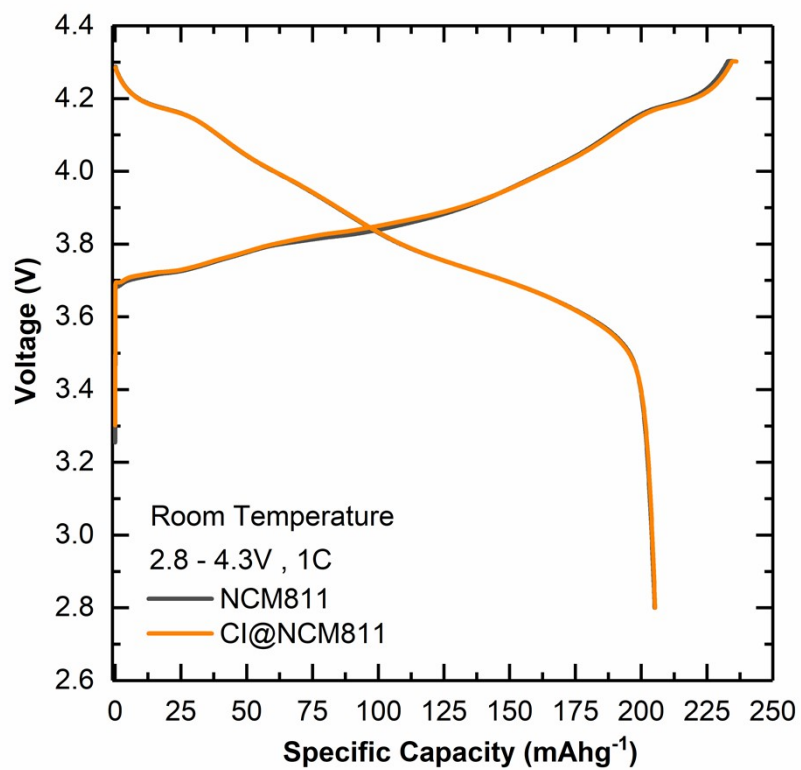

**Fig. S8** Initial voltage profile of NCM811 vs. Cl@NCM811 in the half-cell configuration

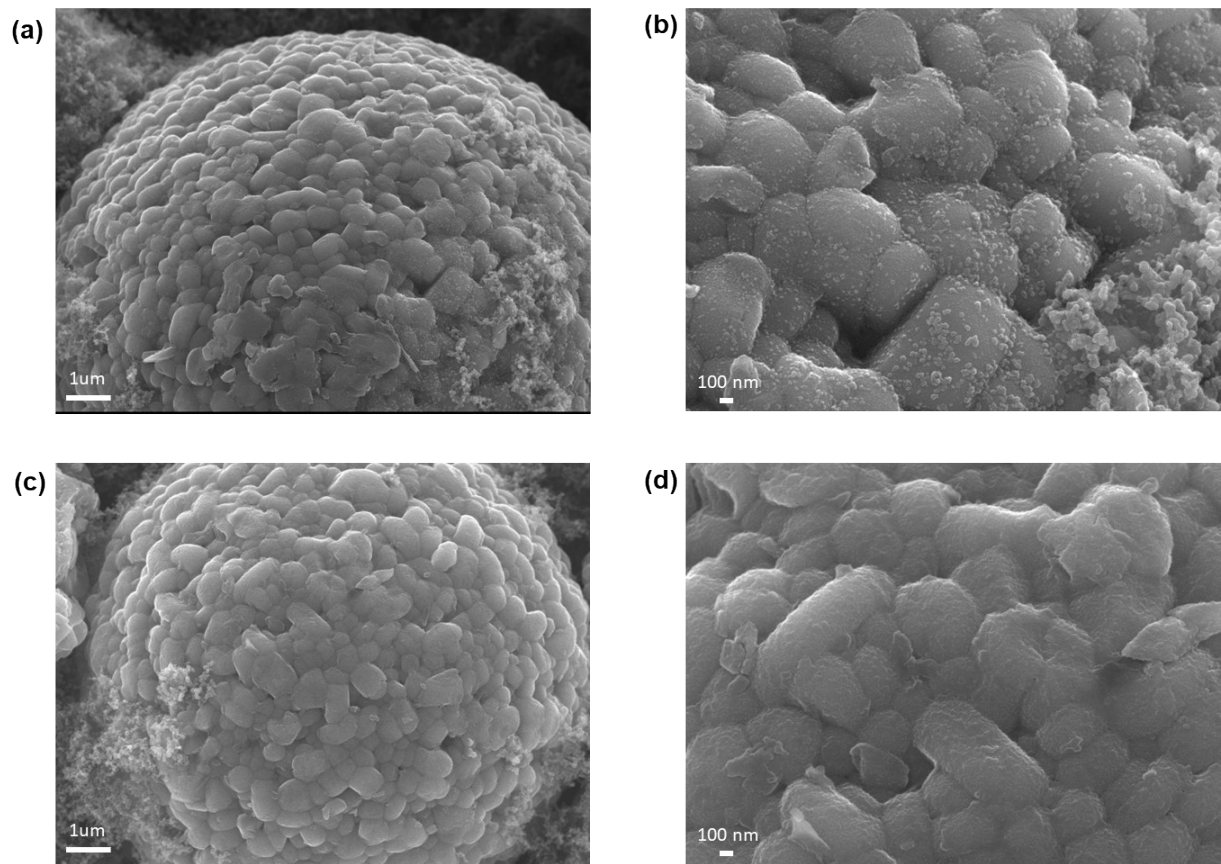

**Fig. S9** SEM images of (a, b) pristine NCM811 and (c, d) Cl@NCM811 electrode after cycling in half cell configuration.

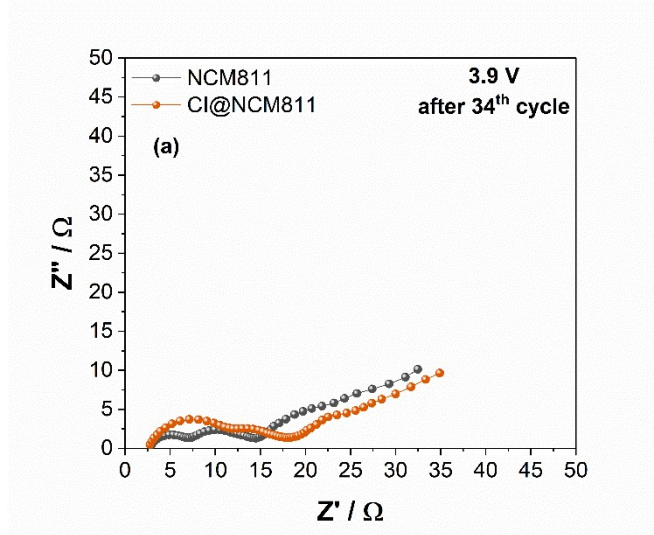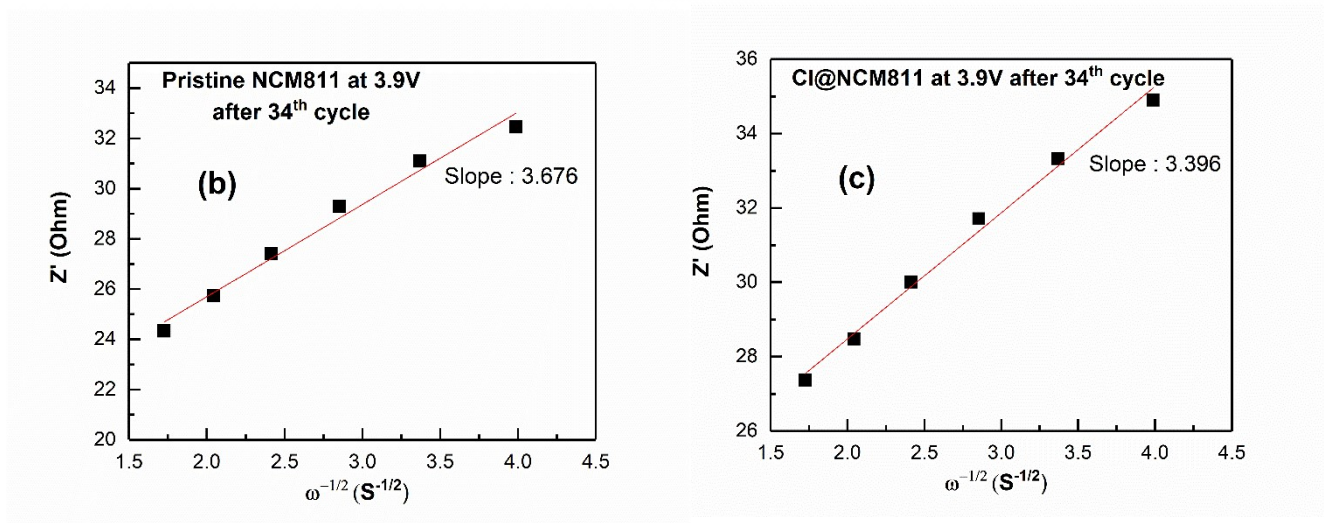

**Fig. S10** The Nyquist plot of pristine NCM811 and Cl@NCM811 after 34<sup>th</sup> cycle at charge state 3.9 V (a). The linear slope of  $Z_w$  and  $\omega^{-1/2}$  at low frequency for pristine NCM811 (b) and Cl@NCM811 (c) after 34<sup>th</sup> cycle at charge state 3.9 V.

The semi-circles of the two electrodes in high-frequency region representing the electrolyte resistance, cathode-electrolyte interface resistance and charge transfer resistance. Low freq tail was attributed to the Warburg impedance ( $Z_w$ ) of  $\text{Li}^+$  diffusion in the cathode material. <sup>1</sup>

The diffusion coefficient value can be obtained by the following equation (1): <sup>2-4</sup>

$$D_{\text{Li}^+} = 0.5 \left( \frac{RT}{A F^2 \sigma_\omega C} \right)^2 \quad (1)$$

Where R represents the gas constant, T is the Kelvin temperature, A is the total surface of the electrode, F is Faraday's constant,  $\sigma_\omega$  is the linear slope between Warburg impedance ( $Z_w$ ) and frequency region ( $\omega^{-1/2}$ ) and C is the molar concentration of lithium in the active material.

The  $\text{Li}^+$  diffusion coefficient calculated by eq 1 of pristine NCM811 and Cl@NCM811 after prolonged cycle condition are  $3.82 \times 10^{-8} \text{ cm}^2 \text{ s}^{-1}$  and  $4.48 \times 10^{-8} \text{ cm}^2 \text{ s}^{-1}$ , respectively. This value were similar to previous report that stated the  $D_{\text{Li}^+}$  in the charge process are between  $10^{-8}$  to  $10^{-9} \text{ cm}^2 \text{ s}^{-1}$ .<sup>5,6</sup>

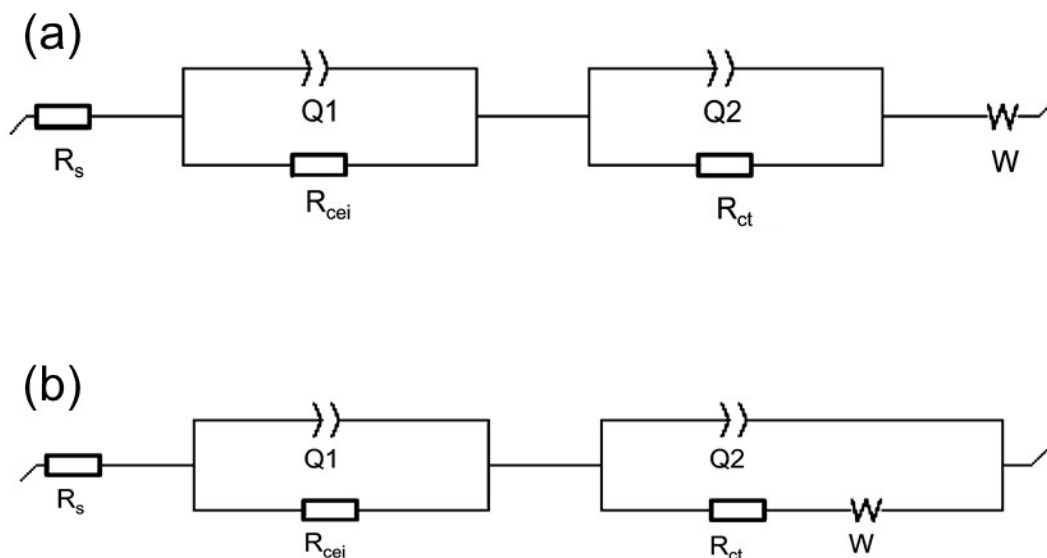

**Fig. S11** Equivalent circuit model for the fitting of Nyquist plot at (a) after 3rd cycle and (b) after 250<sup>th</sup> cycle.

#### References :

- 1 X. Zhang, B. Peng, L. Zhao, G. Wan, F. Wang, S. Zeng, H. Zhang, J. Ding and G. Zhang, *ACS Appl. Mater. Interfaces*, 2022, **14**, 16204–16213.
- 2 K. Tang, X. Yu, J. Sun, H. Li and X. Huang, *Electrochimica Acta*, 2011, **56**, 4869–4875.
- 3 Y. Cui, X. Zhao and R. Guo, *Electrochimica Acta*, 2010, **55**, 922–926.
- 4 C. Hong, Q. Leng, J. Zhu, S. Zheng, H. He, Y. Li, R. Liu, J. Wan and Y. Yang, *J. Mater. Chem. A*, 2020, **8**, 8540–8547.
- 5 K. Märker, P. J. Reeves, C. Xu, K. J. Griffith and C. P. Grey, *Chem. Mater.*, 2019, **31**, 2545–2554.
- 6 H.-J. Noh, S. Youn, C. S. Yoon and Y.-K. Sun, *J. Power Sources*, 2013, **233**, 121–130.
